# Supplementary material for: Neuroprotective Potential of L-Glutamate Transporters in Human Induced Pluripotent Stem Cell-Derived Neural Cells against Excitotoxicity
Source: MDPI journal article supplement (doi:10.3390/ijms241612605), 2023-08-09
Supplement: s1 [file s1]

| Blocker          | Activity                                                               | IC <sub>50</sub> |          |          | Concentration<br>used in this study | Ref |
|------------------|------------------------------------------------------------------------|------------------|----------|----------|-------------------------------------|-----|
|                  |                                                                        | EAAT1            | EAAT2    | EAAT3    |                                     |     |
| <b>TFB-TBOA</b>  | <b>Broad</b><br>long lasting                                           | 22 nM            | 17 nM    | 300 nM   | 30 nM                               | [1] |
| <b>UCPH-101</b>  | <b>Selective EAAT1</b><br>long lasting<br>allosteric<br>noncompetitive | 0.66 μM          | > 300 μM | > 300 μM | 100 μM                              | [2] |
| <b>DHK</b>       | <b>Selective EAAT2</b><br>competitive                                  | > 3 mM           | 23 μM    | > 3 mM   | 300 μM                              | [3] |
| <b>WAY213613</b> | <b>Potent EAAT2</b><br>competitive                                     | 5 μM             | 85 nM    | 3 μM     | 10 μM                               | [4] |

IC<sub>50</sub> values of blocker for the respective glutamate transporter and concentration used in this study.

1. Shimamoto, K.; Sakai, R.; Takaoka, K.; Yumoto, N.; Nakajima, T.; Amara, S.G.; Shigeri, Y. Characterization of novel L-threo-beta-benzyloxyaspartate derivatives, potent blockers of the glutamate transporters. *Mol Pharmacol* **2004**, *65*, 1008-1015, DOI:10.1124/mol.65.4.1008.
2. Abrahamsen, B.; Schneider, N.; Erichsen, M.N.; Huynh, T.H.; Fahlke, C.; Bunch, L.; Jensen, A.A. Allosteric modulation of an excitatory amino acid transporter: the subtype-selective inhibitor UCPH-101 exerts sustained inhibition of EAAT1 through an intramonomeric site in the trimerization domain. *J Neurosci* **2013**, *33*, 1068-1087, DOI:10.1523/jneurosci.3396-12.2013.
3. Arriza, J.L.; Fairman, W.A.; Wadiche, J.I.; Murdoch, G.H.; Kavanaugh, M.P.; Amara, S.G. Functional comparisons of three glutamate transporter subtypes cloned from human motor cortex. *J Neurosci* **1994**, *14*, 5559-5569.
4. Dunlop, J.; McIlvain, H.B.; Carrick, T.A.; Jow, B.; Lu, Q.; Kowal, D.; Lin, S.; Greenfield, A.; Grosanu, C.; Fan, K.; et al. Characterization of novel aryl-ether, biaryl, and fluorene aspartic acid and diaminopropionic acid analogs as potent inhibitors of the high-affinity glutamate transporter EAAT2. *Mol Pharmacol* **2005**, *68*, 974-982, DOI:10.1124/mol.105.012005.
